# Supplementary material
Source: PubMed Central journal article supplement (PMC2575442)
Supplement: 0804950105_0804950105SI.pdf [file 0804950105_0804950105SI.pdf]

# Supporting Information

Levy *et al.* 10.1073/pnas.0804950105

SI Text

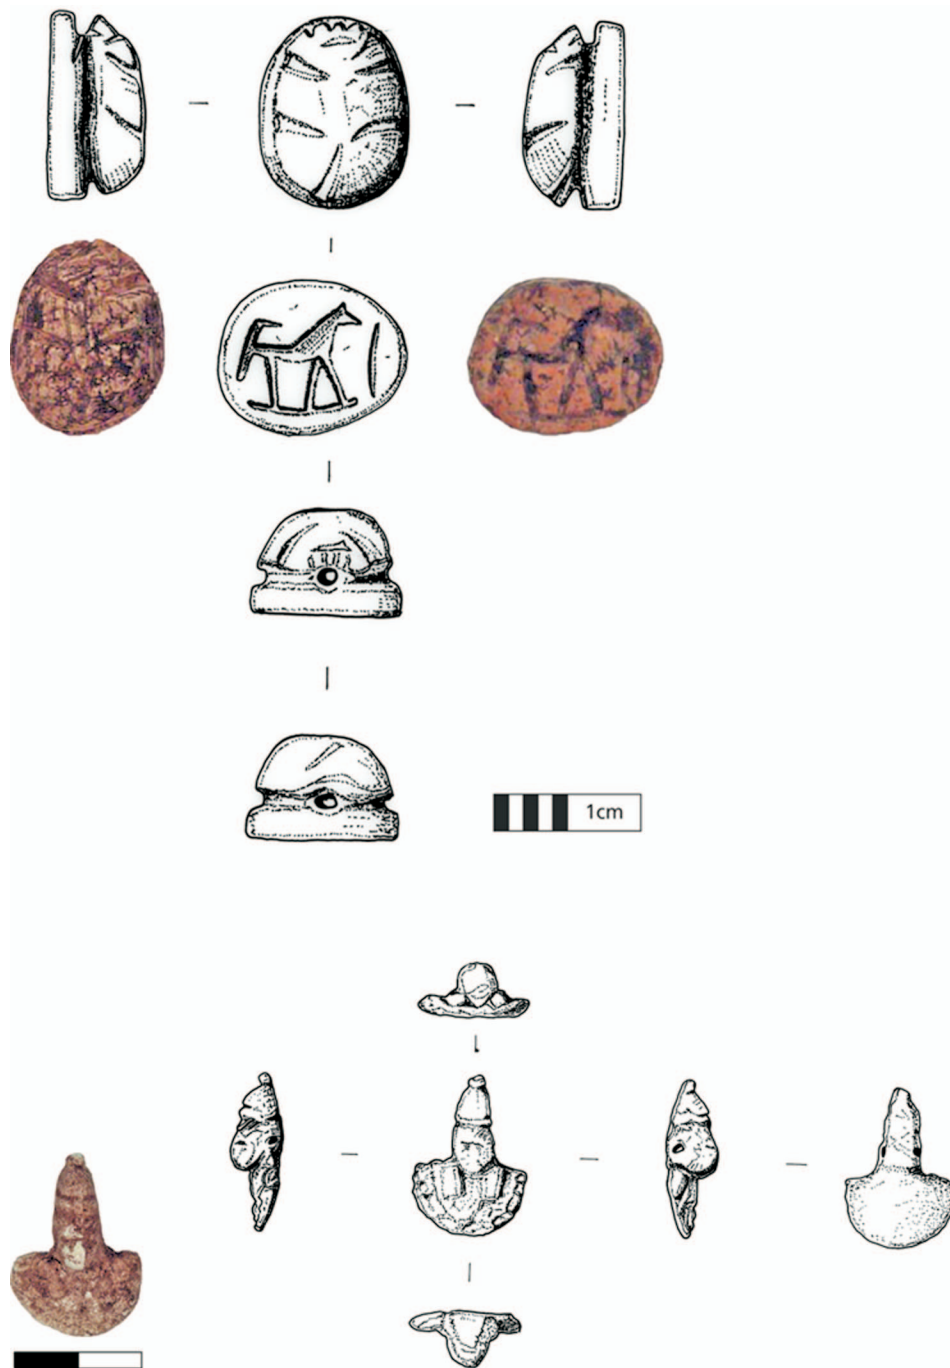

Fig. S1. Iron Age Egyptian artifacts from the Area M excavations at Khirbat en-Nahas, Jordan (drawings by Caroline Hebron, UCSD Levantine Archaeology Lab).

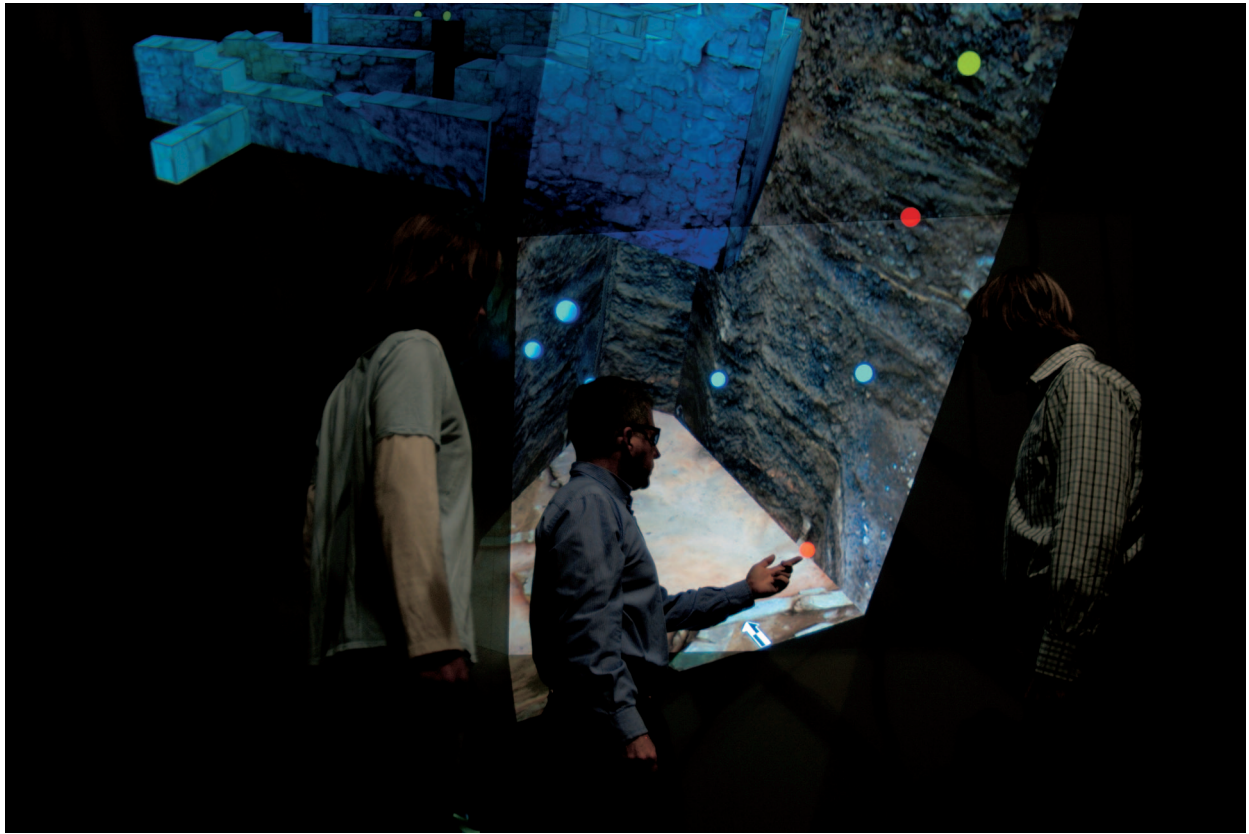

**Fig. S2.** Working on the 3-D model of the Iron Age 4-room building from Area M at Khirbat en-Nahas, Jordan, in the StarCAVE environment at UCSD's Calit2 (photo by Pinar Istek, UCSD Calit2).

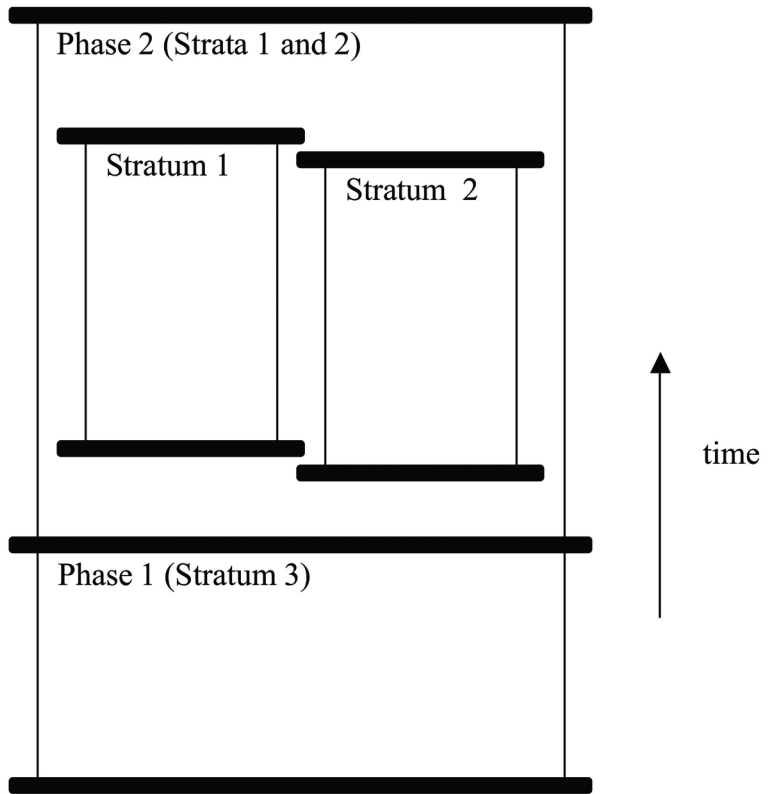

Fig. S3. Schematic of the Bayesian model applied to Area M, Khirbat en-Nahas. The main sequences are shown as boxes here and the boundary events as heavy black lines.

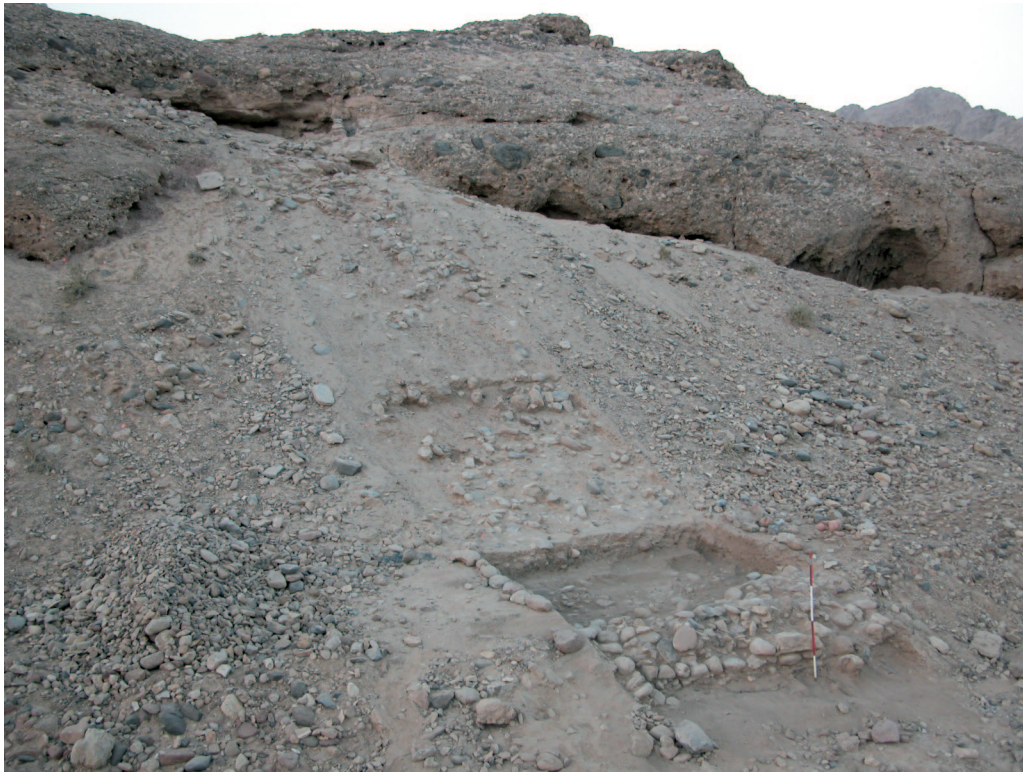

**Fig. S4.** Photographic of the Iron Age “Watchtower” of Rujm Hamra lfdan, Faynan District (WFD 77), Jordan. Section A is at the top, B at the bottom of photo (photo by T. E. Levy).

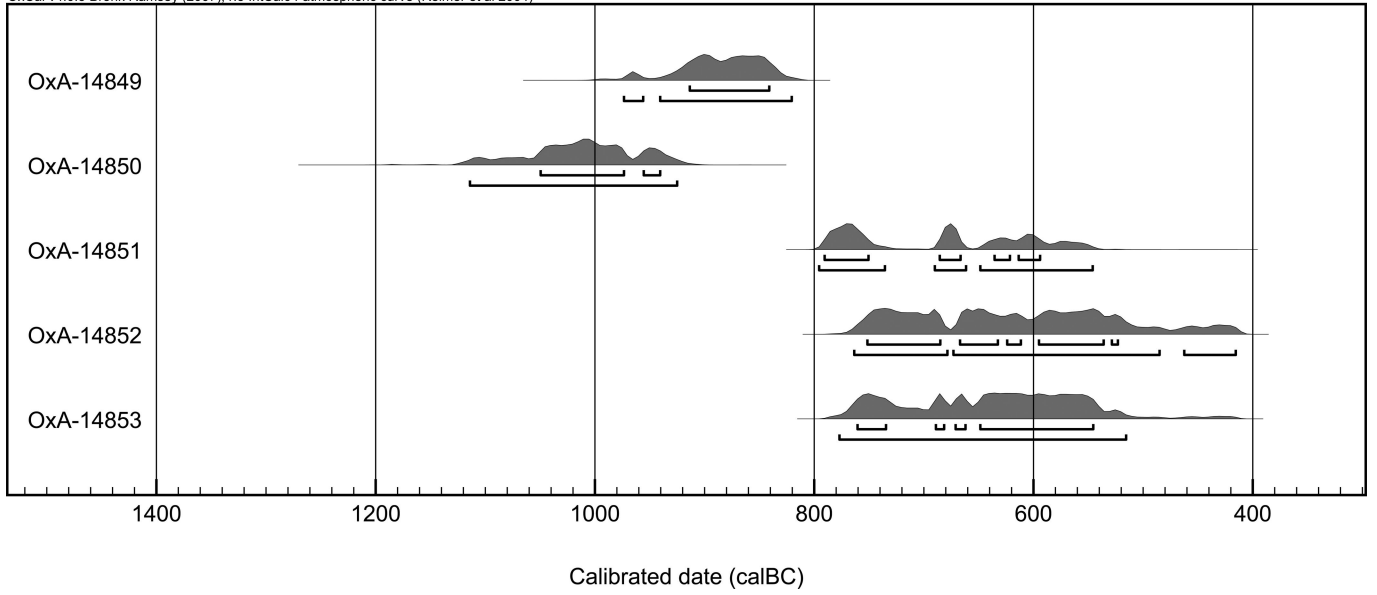

Fig. S5. Calibrated radiocarbon dates from the Iron Age excavations at Rujm Hamra Ifdan, Faynan district, Jordan.

Table S1. Radiocarbon dates and calibrations for Rujm Hamra Ifdan, Faynan District, Jordan

| OxA   | Sample                                    | Material      | Species                    | Date | +/- | $\delta^{13}\text{C}$ (‰) | Calibrated dates (cal BC) |     |                   |     |
|-------|-------------------------------------------|---------------|----------------------------|------|-----|---------------------------|---------------------------|-----|-------------------|-----|
|       |                                           |               |                            |      |     |                           | 68.2% probability         |     | 95.4% probability |     |
|       |                                           |               |                            |      |     |                           | From                      | To  | From              | To  |
| 14849 | WFD77-L501-B54-EDM10045;<br>Sounding A    | Charred seeds | <i>Phoenix dactylifera</i> | 2747 | 28  | -20.6                     | 914                       | 842 | 974               | 821 |
| 14850 | WFD77-L509-B96-EDM10092;<br>Sounding A    | Charred seeds | <i>P. dactylifera</i>      | 2849 | 28  | -21.2                     | 1050                      | 941 | 1115              | 926 |
| 14851 | WFD77-L333-B207-EDM10238;<br>Sounding B   | Charcoal      | <i>Tamarix</i> sp          | 2537 | 27  | -26.7                     | 791                       | 595 | 796               | 547 |
| 14852 | WFD77-L534-B258-EDM10295;<br>Sounding B   | Charcoal      | <i>Tamarix</i> sp          | 2473 | 28  | -24.7                     | 752                       | 524 | 764               | 416 |
| 14853 | WFD77-L10305-B265-EDM10305;<br>Sounding B | Charcoal      | <i>Tamarix</i> sp          | 2495 | 28  | -25.6                     | 761                       | 546 | 778               | 516 |
